# Supplementary material for: Environmental and Nesting Variables Associated with Atlantic Leatherback Sea Turtle (Dermochelys coriacea) Embryonic and Hatching Success Rates in Grenada, West Indies
Source: Animals (Basel). 2023 Feb 16;13(4):685. doi: 10.3390/ani13040685 (PMC9951857; doi:10.3390/ani13040685)
Supplement: Supplementary file 1 [file animals-13-00685-s001.zip › Supplemental File 2.xlsx]

## Sheet: ANOVA
One-way ANOVA to compare mean embryonic development success across 5 years (2015 - 2019)
Source	df	Sum of squares	Mean squares	F	p
Year	4	3.766	0.9415	20.53	1.98e-15
Residuals	408	18.707	0.0459
Total	412
One-way ANOVA to compare mean embryonic development success across 4 nest site locations
Source	df	Sum of squares	Mean squares	F	p
Locations	3	0.495	0.1649	3.069	0.0278
Residuals	409	21.978	0.0537
Total	412
One-way ANOVA to compare mean hatching success across 5 years (2015 - 2019)
Source	df	Sum of squares	Mean squares	F	p
Year	4	2.682	0.6705	15.03	1.81e-11
Residuals	408	18.202	0.0446
Total	412
One-way ANOVA to compare mean hatching success across 4 locations
Source	df	Sum of squares	Mean squares	F	p
Location	3	0.109	0.03649	2.584	0.0533
Residuals	409	4.433	0.01412
Total	412
One-way ANOVA to compare mean proportion of eggs with inspissated yolk across 4 locations
Source	df	Sum of squares	Mean squares	F	p
Location	3	0.294	0.09813	1.949	0.121
Residuals	409	20.589	0.05034
Total	412

## Sheet: TukeyHSD_and_Bonferroni
Tukey multiple comparisons of development success across years 95% confidence interval							Bonferroni adjusted p value of multiple comparisons of development success across years
Years	Difference of means	lower	upper	p adjusted			Years	p adjusted
2016 vs 2015	-0.203687	-0.287974	-0.1194	0			2016 vs 2015	2.4e-09
2017 vs 2015	-0.191884	-0.299899	-0.083868	1.6e-05			2017 vs 2015	1.5e-05
2018 vs 2015	-0.227911	-0.33129	-0.124533	0			2018 vs 2015	3.1e-08
2019 vs 2015	-0.247006	-0.326834	-0.167178	0			2019 vs 2015	3.5e-15
2017 vs 2016	0.0118038	-0.0951898	0.118797	0.998179			2017 vs 2016	1
2018 vs 2016	-0.0242238	-0.126534	0.0780864	0.966821			2018 vs 2016	1
2019 vs 2016	-0.0433185	-0.121758	0.0351211	0.554473			2019 vs 2016	0.99
2018 vs 2017	-0.0360276	-0.158626	0.086571	0.928957			2018 vs 2017	1
2019 vs 2017	-0.0551223	-0.158639	0.0483949	0.589747			2019 vs 2017	1
2019 vs 2018	-0.0190947	-0.117764	0.0795743	0.984212			2019 vs 2018	1
Tukey multiple comparisons of development success across 4 locations and 95% CI							Bonferroni adjusted p value of multiple comparisons of development success across 4 locations
Locations	Difference of means	lower	upper	p adjusted			Locations	p adjusted
2 vs 1	0.00427325	-0.144949	0.153495	0.999855			2 vs 1	1
3 vs 1	0.1034	-0.0225734	0.229373	0.14927			3 vs 1	0.179
4 vs 1	0.0699021	-0.0557364	0.195541	0.478061			4 vs 1	0.903
3 vs 2	0.0991263	-0.00397475	0.202227	0.0645379			3 vs 2	0.066
4 vs 2	0.0656288	-0.0370633	0.168321	0.352592			4 vs 2	0.593
4 vs 3	-0.0334975	-0.0978995	0.0309046	0.53685			4 vs 3	0.881
Tukey multiple comparisons of mean hatching success across years and 95% CI							Bonferroni adjusted p value of multiple comparisons of hatcing success across 4 locations
Years	Difference of means	lower	upper	p adjusted			Years	p adjusted
2016 vs 2015	-0.194242	-0.277383	-0.111101	0			2016 vs 2015	7.8e-09
2017 vs 2015	-0.226081	-0.332628	-0.119535	1e-07			2017 vs 2015	1.2e-07
2018 vs 2015	-0.181129	-0.283102	-0.0791565	1.6e-05			2018 vs 2015	1.6e-05
2019 vs 2015	-0.17532	-0.254062	-0.0965779	0			2019 vs 2015	2.4e-08
2017 vs 2016	-0.0318398	-0.137378	0.0736989	0.922311			2017 vs 2016	1
2018 vs 2016	0.0131125	-0.0878065	0.114031	0.996554			2018 vs 2016	1
2019 vs 2016	0.0189215	-0.0584514	0.0962944	0.96272			2019 vs 2016	1
2018 vs 2017	0.0449522	-0.0759792	0.165884	0.846796			2018 vs 2017	1
2019 vs 2017	0.0507612	-0.0513482	0.152871	0.65229			2019 vs 2017	1
2019 vs 2018	0.00580902	-0.0915182	0.103136	0.999839			2019 vs 2018	1
Tukey multiple comparisons of hatching success across 4 locations and 95% CI							Bonferroni adjusted p value of multiple comparisons of hatching success across 4 locations
Locations	Difference of means	lower	upper	p adjusted			Locations	p adjusted
2 vs 1	-0.0218222	-0.166252	0.122607	0.979875			2 vs 1	1
3 vs 1	0.0619641	-0.0599629	0.183891	0.556433			3 vs 1	1
4 vs 1	0.0300012	-0.0916021	0.151605	0.920196			4 vs 1	1
3 vs 2	0.0837864	-0.0160034	0.183576	0.134575			3 vs 2	0.16
4 vs 2	0.0518235	-0.0475705	0.151217	0.534779			4 vs 2	1
4 vs 3	-0.0319629	-0.0942966	0.0303708	0.548928			4 vs 3	0.95
