# Supplementary material for: Environmental and Nesting Variables Associated with Atlantic Leatherback Sea Turtle (Dermochelys coriacea) Embryonic and Hatching Success Rates in Grenada, West Indies
Source: Animals (Basel). 2023 Feb 16;13(4):685. doi: 10.3390/ani13040685 (PMC9951857; doi:10.3390/ani13040685)
Supplement: Supplementary file 1 [file animals-13-00685-s001.zip › Supplemental File 3.xlsx]

## Sheet: Hatching_Success
Table: Simple linear regression models to establish relationship between environmental variables and hatching success (dependent variable)
Relationship between % hatching success and depth of the top of the egg chamber (cm)
Independent variable	Estimate	Standard error	t value	p value	Adjusted R2	F-statistic	df
(Intercept)	14.3385	5.11633	2.803	0.00531	0.07157	32.53	408
Depth of the top of the egg chamber (cm)	0.5034	0.08827	5.703	2.26e-08
Relationship between % hatching success and depth of the bottom of the egg chamber (cm)
(Intercept)	6.94813	7.15533	0.971	0.3321	0.03	13.72	410
Depth of the bottom of the egg chamber (cm)	0.3402	0.09186	3.703	0.000242
Relationship between hatching success and microbial growth
(Intercept)	36.0731	1.18834	30.356	2e-16	0.0667	30.46	411
% Microbial growth	-0.54258	0.09832	-5.519	6.06e-08
Relationship between hatching success and nest distance from vegetation
(Intercept)	35.583	2.6176	13.59	2e-16	0.000457	1.188	410
Distance of nest to vegetation (cm)	-0.2097	0.1924	-1.09	0.276
Relationship between hatching success and high water mark
(Intercept)	34.4223	4.14854	8.297	1.55e-15	-0.002129	0.127	410
Distance of nest to high water mark (cm)	-0.05121	0.1437	-0.356	0.722
Table: Multiple linear regression models to establish the effect of microbial growth, depth of top of the egg chamber and year (independent variables) on hatching success (dependent variable)
(Intercept)	29.1308	5.31474	5.481	7.48e-08	0.258	24.7	402
% Microbial growth	-0.69457	0.08902	-7.802	5.3e-14
Depth of top of the egg chamber (cm)	0.39578	0.08109	4.881	1.53e-06
Year2016	-19.8489	2.83432	-7.003	1.06e-11
Year2017	-23.1176	3.65785	-6.32	6.95e-10
Year2018	-15.0324	3.61706	-4.156	3.96e-05
Year2019	-18.0044	2.6558	-6.779	4.32e-11
p < 2.2E-16
Table: Multiple linear regression model to establish the effect of microbial growth, depth of the top of the egg chamber, eggs with inspissated yolk (independent variables) on hatching success (dependent variable) for 2016 - 2019
Independent variable	Estimate	Standard error	t value	p value	Adjusted R2	F-statistic	df
(Intercept)	13.0627	4.9	2.666	0.00808	0.1442	18.64	311
% Microbial growth	-0.5475	0.1111	-4.929	1.34e-06
% Eggs with inspissated yolk	-0.268	0.1024	-2.617	0.0093
Depth of the top of the egg chamber (cm)	0.3583	0.0862	4.156	4.19e-05
p < 3.813E-11
Data available for 2016, 2017, 2018 and 2019, no data on inspissated yolk in 2015

## Sheet: Embryo_development_success
Table: Simple linear regression models to establish relationship between environmental variables and embryo development success (dependent variable)
Relationship between embryo development success and depth of the top of the egg chamber (cm)
Independent variable	Estimate	Standard error	t value	p value	Adjusted R2	F-statistic	df
(Intercept)	14.3385	5.11633	2.803	0.00531	0.07157	32.53	408
Depth of the top of the egg chamber (cm)	0.5034	0.08827	5.703	2.26e-08
Relationship between embryo development success and depth of the bottom of the egg chamber (cm)
(Intercept)	9.65866	7.34186	1.316	0.189	0.046	20.84	410
Depth of the bottom of the egg chamber (cm)	0.43031	0.09427	4.565	6.62e-06
Relationship between embryo development success and microbial growth
(Intercept)	46.0544	1.2188	37.787	2e-16	0.0844	39.09	412
% Microbial growth	-0.6312	0.101	-6.252	1.02e-09
Relationship between embryo development success and nest distance from vegetation
(Intercept)	43.4666	2.71499	16.01	2e-16	-0.002145	0.12	410
Distance of nest to vegetation (cm)	-0.06921	0.19958	-0.347	0.729
Relationship between embryo development success and high water mark
(Intercept)	48.6658	4.2868	11.353	2e-16	0.00278	2.147	410
Distance of nest to high water mark (cm)	-0.2176	0.1485	-1.465	0.144
Table: Multiple linear regression models to determine the effect of microbial growth, depth of top of the egg chamber and year (independent variables) on embryo development
Independent variable	Estimate	Standard error	t value	p value	Adjusted R2	F-statistic	df
(Intercept)	37.2838	5.20899	7.158	3.91e-12	0.3362	35.53	403
% Microbial growth	-0.78817	0.08724	-9.034	2e-16
Depth of the top of the egg chamber (cm)	0.47543	0.07948	5.982	4.88e-09
Year2016	-21.014	2.77223	-7.58	2.4e-13
Year2017	-19.3688	3.58542	-5.402	1.13e-07
Year2018	-18.9171	3.5454	-5.336	1.59e-07
Year2019	-25.5066	2.60323	-9.798	2e-16
p < 2.2E-16
Table: Multiple linear regression model to establish the effect of microbial growth, depth of the top of the egg chamber, eggs with inspissated yolk (independent variables) on embryo development success (dependent variable) for 2016 - 2019
Independent variable	Estimate	Standard error	t value	p value	Adjusted R2	F-statistic	df
(Intercept)	17.0997	4.85995	3.518	0.000499	0.194	26.34	312
% Microbial growth	-0.57371	0.11018	-5.207	3.49e-07
% Eggs with inspissated yolk	-0.36655	0.10157	-3.609	0.000358
Depth of the top of the egg chamber (cm)	0.45289	0.08552	5.296	2.24e-07
p-value: 3.264e-15
Data available for 2016, 2017, 2018 and 2019, no data on inspissated yolk in 2015

## Sheet: Temperature_effects
Table: Simple linear regression models to establish relationship between top and bottom of the nest chamber and mean nest temperature (dependent variable)
Independent variable	Estimate	Standard error	t value	p value	Adjusted R2	F-statistic	df
(Intercept)	37.4579	2.51931	14.868	2.49e-05	0.4123	5.21	6
Depth of the top of the egg chamber (cm)	-0.08709	0.03815	-2.283	0.0713
Relationship between temperature and depth of the bottom of the egg chamber (cm)
(Intercept)	41.2514	4.04171	10.206	5.15e-05	0.3878	5.434	6
Depth of the bottom of the egg chamber (cm)	0.11438	0.04906	-2.331	0.0585
